# Supplementary figures and images for: Improvement of Solder Joint Shear Strength under Formic Acid Atmosphere at A Low Temperature
Source: MDPI journal article supplement (doi:10.3390/ma17051055), 2024-02-25

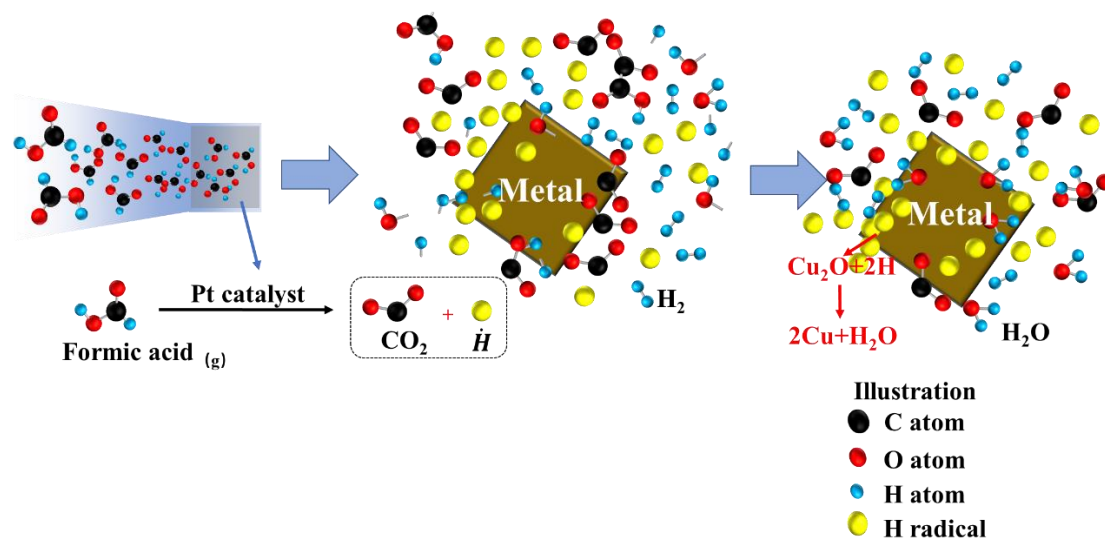

Fig. S1. Schematic diagram of Pt catalytic principle.

Supplement: s1 [file s1]
